# Supplementary material
Source: Springer Nature journal article supplement (https://www.springermedizin.de/resource/supplementary/13012_2010_421_MOESM1_ESM.PDF/9629722)
Supplement: MOESM1 [file 9629722]

# Additional file 1

## Survey

---

### A. Organization characteristics

**A1. What is the name of your organization?**

**A2. Which kind of organization is your institution?**

- ☐ Public institution
- ☐ Private organism
- ☐ Scientific society
- ☐ Other

If other, please specify.....

**A3. How many years have you been developing guidelines?**

- ☐ Less than 3 years
- ☐ 3-5 years
- ☐ 6-10 years
- ☐ More than 10 years

**A4. How many guidelines do you publish per year?**

- ☐ Less than 3 per year
- ☐ 3-5 per year
- ☐ 6-10 per year
- ☐ More than 10 per year

**A5. Does your organization update its guidelines?**

- ☐ Yes
- ☐ No

### B. The updating process

**B1. How many guidelines per year do you check to assess the need of updating?**

- ☐ Less than 3
- ☐ 3-5 per year
- ☐ 6-10 per year
- ☐ More than 10 per year
- ☐ Varies.

If varies, please specify.....

**B2. How many do you actually update (partially or globally)?**

- ☐ None
- ☐ Less than 3
- ☐ 3-5 per year
- ☐ 6-10 per year
- ☐ More than 10
- ☐ Varies

If you know the actual percentage of Guidelines do you update, please specify.....

**B3. Does your organization have a formal procedure to update your guidelines or recommendations?**

- ☐ No
- ☐ Yes

If YES please specify if it is published somewhere and if available on-line provide the link.....

**B4. Do you have a specific time frame to decide when to check for the need of updating a guideline?**

- ☐ No, it varies
- ☐ Less than 3 years
- ☐ 3 years
- ☐ 4-5 years
- ☐ More than 5 years

**B5. Who decides the need for updating? (More than one option possible)**

- |                          |                             |                              |
|--------------------------|-----------------------------|------------------------------|
| Guideline coordinator    | <input type="checkbox"/> No | <input type="checkbox"/> Yes |
| Guideline group          | <input type="checkbox"/> No | <input type="checkbox"/> Yes |
| Expert committee         | <input type="checkbox"/> No | <input type="checkbox"/> Yes |
| Standing Editorial staff | <input type="checkbox"/> No | <input type="checkbox"/> Yes |
| Other                    | <input type="checkbox"/> No | <input type="checkbox"/> Yes |

If guideline group please specify if the original group or just a few. If other please specify.....

**B6. Which parts of the guideline do you check?**

- Key recommendations ☐ No ☐ Yes ☐ Partially

|                     |                             |                              |                                    |
|---------------------|-----------------------------|------------------------------|------------------------------------|
| All recommendations | <input type="checkbox"/> No | <input type="checkbox"/> Yes | <input type="checkbox"/> Partially |
| Key questions       | <input type="checkbox"/> No | <input type="checkbox"/> Yes | <input type="checkbox"/> Partially |
| Full text           | <input type="checkbox"/> No | <input type="checkbox"/> Yes | <input type="checkbox"/> Partially |
| Patient information | <input type="checkbox"/> No | <input type="checkbox"/> Yes | <input type="checkbox"/> Partially |
| Annexes             | <input type="checkbox"/> No | <input type="checkbox"/> Yes | <input type="checkbox"/> Partially |

**B7. Do you have a formal process to decide when a guideline becomes out of date (e.g. if new evidence available)?**

- ☐ No  
☐ Yes

If yes, please specify.....

**B8. Do you have a formal method to reach a consensus or to decide whether to update just a section or the full guideline?**

- ☐ No  
☐ Yes

If yes please specify (Delphi, voting, etc.).....

**B9. Who participates in the updating process?**

|                                          |                             |                              |                                    |
|------------------------------------------|-----------------------------|------------------------------|------------------------------------|
| Original guideline authors               | <input type="checkbox"/> No | <input type="checkbox"/> Yes | <input type="checkbox"/> Sometimes |
| Original information managers/specialist | <input type="checkbox"/> No | <input type="checkbox"/> Yes | <input type="checkbox"/> Sometimes |
| Original external-reviewers              | <input type="checkbox"/> No | <input type="checkbox"/> Yes | <input type="checkbox"/> Sometimes |
| New group of experts                     | <input type="checkbox"/> No | <input type="checkbox"/> Yes | <input type="checkbox"/> Sometimes |
| Patients                                 | <input type="checkbox"/> No | <input type="checkbox"/> Yes | <input type="checkbox"/> Sometimes |
| Staff of organization                    | <input type="checkbox"/> No | <input type="checkbox"/> Yes | <input type="checkbox"/> Sometimes |
| Others                                   | <input type="checkbox"/> No | <input type="checkbox"/> Yes | <input type="checkbox"/> Sometimes |

If others or sometimes please specify.....

**B10. What kind of searches do you run when updating?**

|                                                                                          |                             |                              |
|------------------------------------------------------------------------------------------|-----------------------------|------------------------------|
| Original search strategies                                                               | <input type="checkbox"/> No | <input type="checkbox"/> Yes |
| Original searches strategies modified to be specific rather than sensitive               | <input type="checkbox"/> No | <input type="checkbox"/> Yes |
| Original search strategies plus some horizon scanning (eg. new treatments or technology) | <input type="checkbox"/> No | <input type="checkbox"/> Yes |
| Other                                                                                    | <input type="checkbox"/> No | <input type="checkbox"/> Yes |

Please, comment your answer.....

**B11. Has the updating process used in your organization been piloted?**

- ☐ No  
☐ Yes

If yes, please specify.....

**B12. How rigorous do you think is the updating process that you use?**

- ☐ Unreliable  
☐ Not very reliable  
☐ Could certainly be more rigorous  
☐ Moderately rigorous  
☐ Very rigorous

**B13. Do you check for other guidelines about the same topic of interest when developing a guideline?<sup>a</sup>**

- ☐ No  
☐ Yes

**B14. In case you do, do you trust their evidence synthesis and update only from the search date of this guideline? <sup>a</sup>**

- ☐ Yes  
☐ No, we only use them to check if we miss relevant references  
☐ No, never  
☐ Others

If others, please specify.....

**B15. Does your organization adapt CPG when developing your own? <sup>a</sup>**

- ☐ No  
☐ Yes

**B16. In case you do, does your organization take part in the ADAPTE Collaboration? <sup>a</sup>**

- ☐ No  
☐ Yes

### **C. Updating and users**

**C1. Do you alert guideline users on your website when a guideline is older than a certain number of years or when there is a risk of being outdated?**

- ☐ No  
☐ Yes

If yes please specify how you do it.....

**C2. How do you alert guideline users when a modification has taken place?**

**D. Updating CPG in the future**

**D1. Do you think is it worth having living guidelines? Considering "living" as guidelines that are continuously being monitored and updated.**

- ☐ No  
☐ Yes  
☐ Not sure

Regardless of your answer please comment pros and cons.....

**D2. Do you have plans in your organization to set up a protocol to improve the updating of your guidelines?**

- ☐ No  
☐ Yes  
☐ Maybe

If yes, please specify.....

**D3. Would your organization be willing to share resources to optimize guideline updating and/or developing process internationally?**

- ☐ No  
☐ Yes  
☐ Not sure

If not sure please tell us why or what would it depend on.....

**D4. Which resources would you be willing to share with other organizations?**

|                                                                                                                            |                             |                              |                                   |                                       |
|----------------------------------------------------------------------------------------------------------------------------|-----------------------------|------------------------------|-----------------------------------|---------------------------------------|
| Key questions                                                                                                              | <input type="checkbox"/> No | <input type="checkbox"/> Yes | <input type="checkbox"/> Not sure | <input type="checkbox"/> Not worth it |
| Search strategies                                                                                                          | <input type="checkbox"/> No | <input type="checkbox"/> Yes | <input type="checkbox"/> Not sure | <input type="checkbox"/> Not worth it |
| References                                                                                                                 | <input type="checkbox"/> No | <input type="checkbox"/> Yes | <input type="checkbox"/> Not sure | <input type="checkbox"/> Not worth it |
| Evidence tables                                                                                                            | <input type="checkbox"/> No | <input type="checkbox"/> Yes | <input type="checkbox"/> Not sure | <input type="checkbox"/> Not worth it |
| Evidence synthesis                                                                                                         | <input type="checkbox"/> No | <input type="checkbox"/> Yes | <input type="checkbox"/> Not sure | <input type="checkbox"/> Not worth it |
| Considered judgement forms (document that explicitly includes the factors taken into account when grading recommendations) | <input type="checkbox"/> No | <input type="checkbox"/> Yes | <input type="checkbox"/> Not sure | <input type="checkbox"/> Not worth it |

**E. Please comment about any issues you find relevant, and you want to mention, regarding updating clinical guidelines that might be of use for our survey. Thank you for your help!**

---

<sup>a</sup>Excluded item
